# Supplementary material
Source: Springer Nature journal article supplement (https://www.springermedizin.de/resource/supplementary/12943_2010_662_MOESM3_ESM.pdf/9554510)

**A**

1h, 22°C

| - | DMSO | LA-12 | 17-AAG |
|---|------|-------|--------|
|   | 4%   | 200   | 100    |

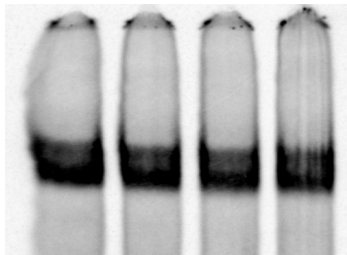**B**

22°C

37°C

1h, 37°C, Hsp90β

| 22°C | 37°C | DMSO |    |    | LA-12 |     |     | 17-AAG |     |     |
|------|------|------|----|----|-------|-----|-----|--------|-----|-----|
| 2%   | 2%   | 2%   | 4% | 6% | 100   | 200 | 300 | 50     | 100 | 200 |

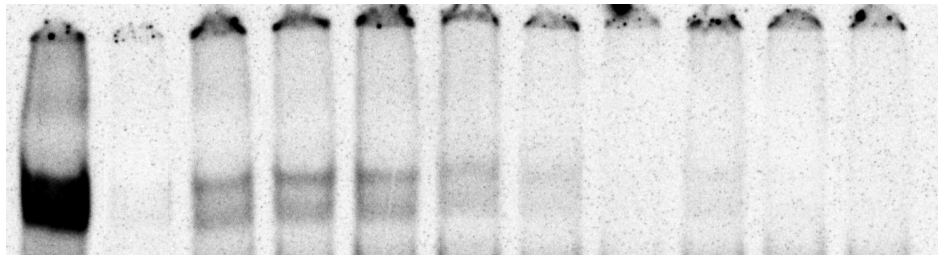

Supplement: MOESM3 [file 9554510]
